# Supplementary material for: Surface photochemistry: benzophenone as a probe for the study of silica and reversed-phase silica surfaces
Source: Royal Society of Chemistry journal article supplement (doi:10.1039/b600384b), 2006-04-07
Supplement: b600384b.pdf [file b600384b.pdf]

## Surface Photochemistry: Benzophenone as a Probe for the Study of Silica and Reversed Phase Silica Surfaces

In this Lifetime Distribution Analysis model, it is assumed that the lifetimes distribution of an excited probe adsorbed on a heterogeneous, porous substrate is a consequence of a distribution of  $\Delta G^0$  of activation for the probe adsorption on the substrate around a mean value  $\overline{\Delta G^0}$ :

$$\Delta G^0 = \overline{\Delta G^0} - \gamma x RT \quad (1)$$

or, in terms of first rate constant,  $k$ :

$$\ln(k) = \ln(\overline{k}) - \gamma x \Rightarrow k = \overline{k} \exp(-\gamma x) \quad (2)$$

where  $\gamma$  is a measure of the distribution width (half full width at maximum  $\times \exp(-1)$ ). The distribution function is a sum of symmetrical or asymmetrical Voigt profiles – Gaussian-Lorentzian products – defined in Equation 3:

$$\alpha(\ln(k_j)) = \sum_i \frac{\alpha_{\max i} \exp\left(-\frac{(1 - m_i)(\ln(k_j) - \ln(\overline{k}_i))^2 \ln(2)}{(a_i L_i / 2)^2}\right)}{1 + m_i \frac{(\ln(k_j) - \ln(\overline{k}_i))^2}{(a_i L_i / 2)^2}} \quad (3)$$

where  $\alpha(\ln(k_j))$  is the relative weight of  $k_j$  in the total distribution,  $\overline{k}_i$  is the position of the maximum of profile  $i$ ,  $\alpha_{\max i}$  is its maximum,  $L_i$  is its full width at half maximum (fwhm),  $m_i$  is the Lorentzian weight in the profile  $i$  ( $m_i = 1$  corresponds to a pure Lorentzian and  $m_i = 0$  corresponds to a pure Gaussian), and  $a_i$  is the asymmetry factor taking the value 1 for  $k_j \geq \overline{k}_i$  and a value  $\geq 0$  for  $k_j < \overline{k}_i$ .

The decay curve will, then, be given by:

$$I(t) = \sum_j \alpha(\ln(k_j)) \exp(-k_j t) \quad (4)$$

or, in terms of normalized intensity:

$$\frac{I(t)}{I(0)} = \frac{\sum_j \alpha(\ln(k_j)) \exp(-k_j t)}{\sum_j \alpha(\ln(k_j))} \quad (5)$$

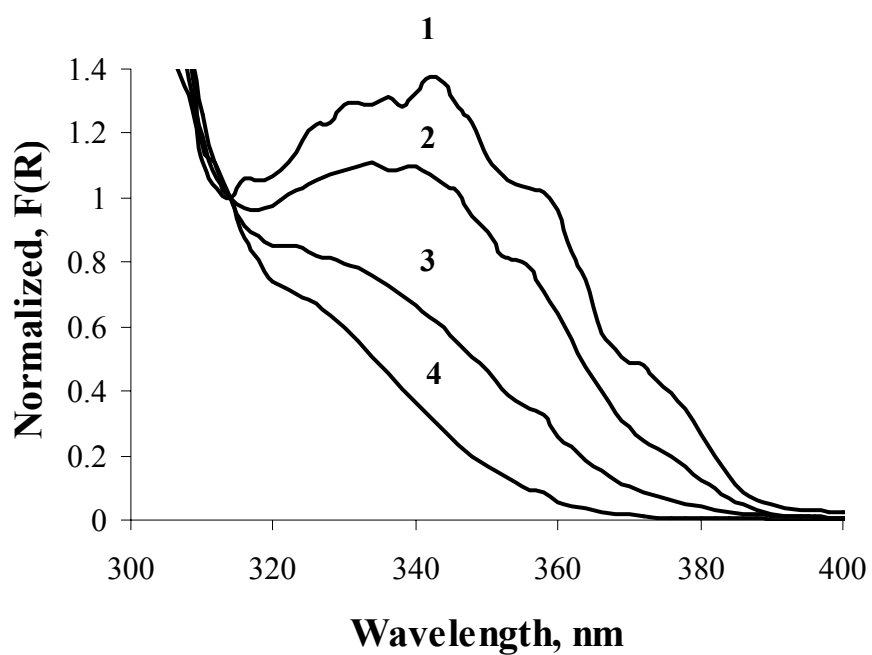

Fig. S1

Remission functions for BZP / host samples ( $n \rightarrow \pi^*$  transition only) with 250  $\mu\text{mol}$  of the probe per gram of the substrate. Curve 1: Silicalite; 2: reversed-phase silica RP-18; 3: RP-8; 4: 60 Å Silica.

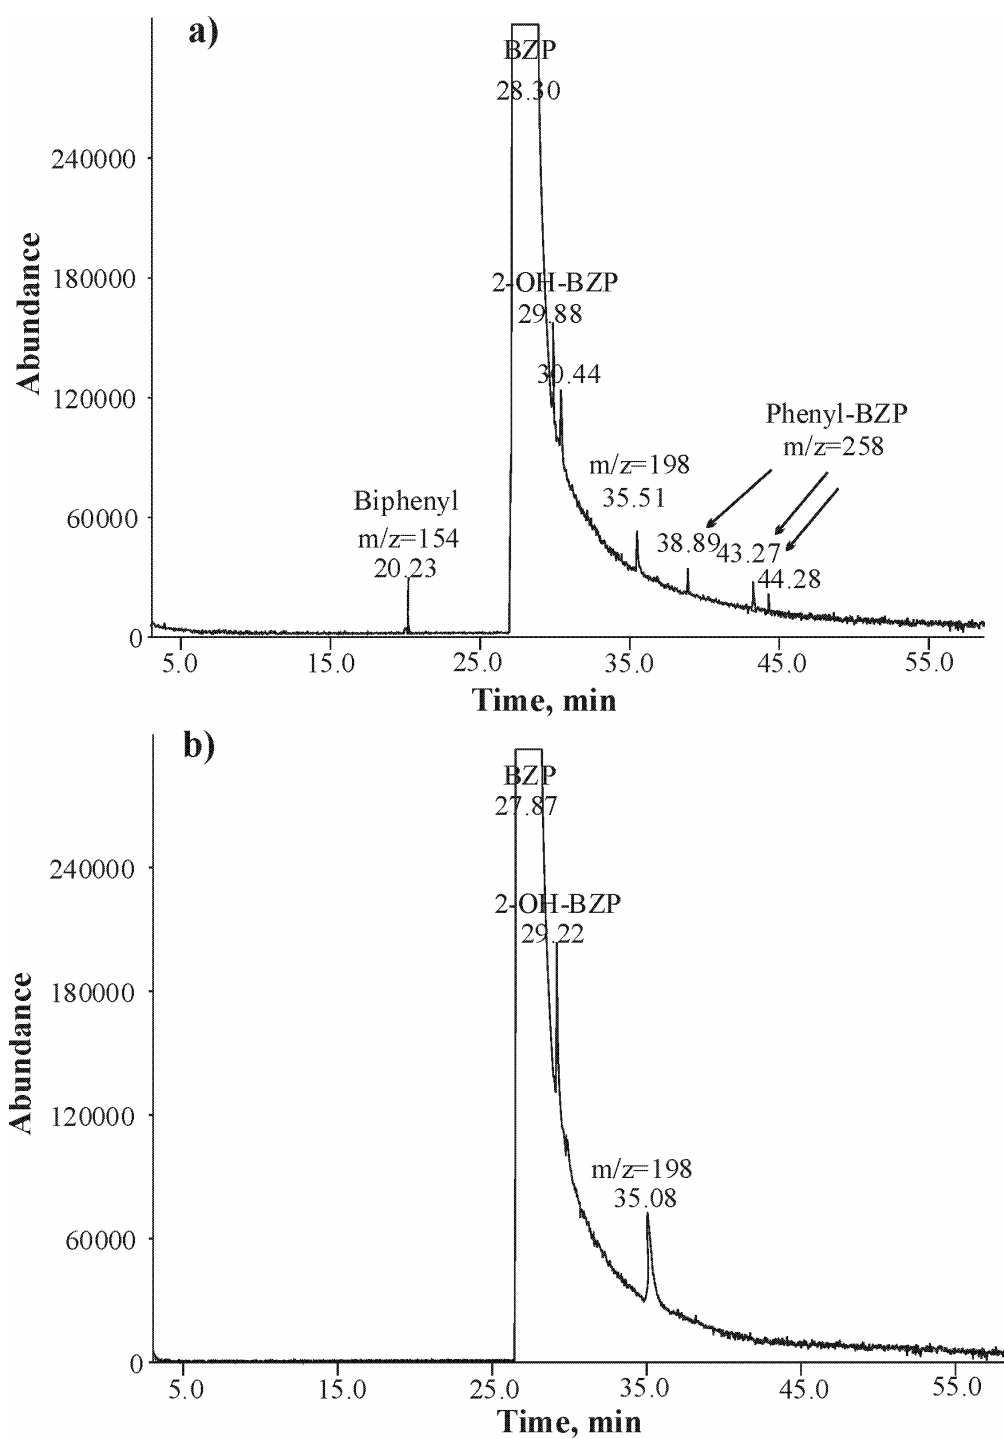

Fig. S2 – Chromatographic results (GC-MS) of the extracts of benzophenone adsorbed onto 60 Å pore silica, with: a) 266 nm excitation and b) 355 nm excitation.
